# Supplementary material for: Association of Elevated Serum Soluble Cd226 Levels With the Disease Activity and Flares of Systemic Lupus Erythematosus
Source: Research Square preprint supplement (doi:10.21203/rs.3.rs-377056/v1), 2021-04-06
Supplement: Supplementary file 1 [file 9fd0f7e6f6e36c0c923b859e.pdf]

## Supplementary Figure S1

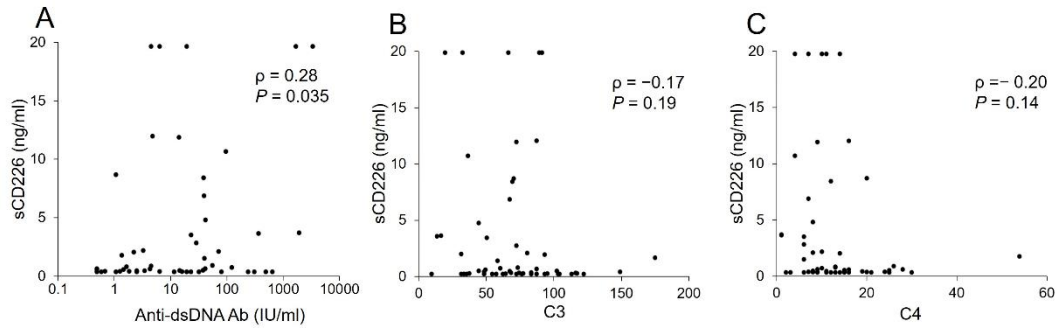

### Supplementary Figure S1 Associations between serum sCD226 levels and conventional biomarkers

Correlations between serum sCD226 levels and anti-dsDNA antibody (Ab) titers (A), serum C3 (B), and C4 (C) levels in SLE patients. Each data point represents a single subject. Correlation analyses were done using Spearman's rank correlation. sCD226: soluble CD226; SLE: systemic lupus erythematosus.
